# Supplementary material for: Hantavirus in Panama: Twenty Years of Epidemiological Surveillance Experience
Source: MDPI journal article supplement (doi:10.3390/v15061395), 2023-06-19
Supplement: s1 [file s1]

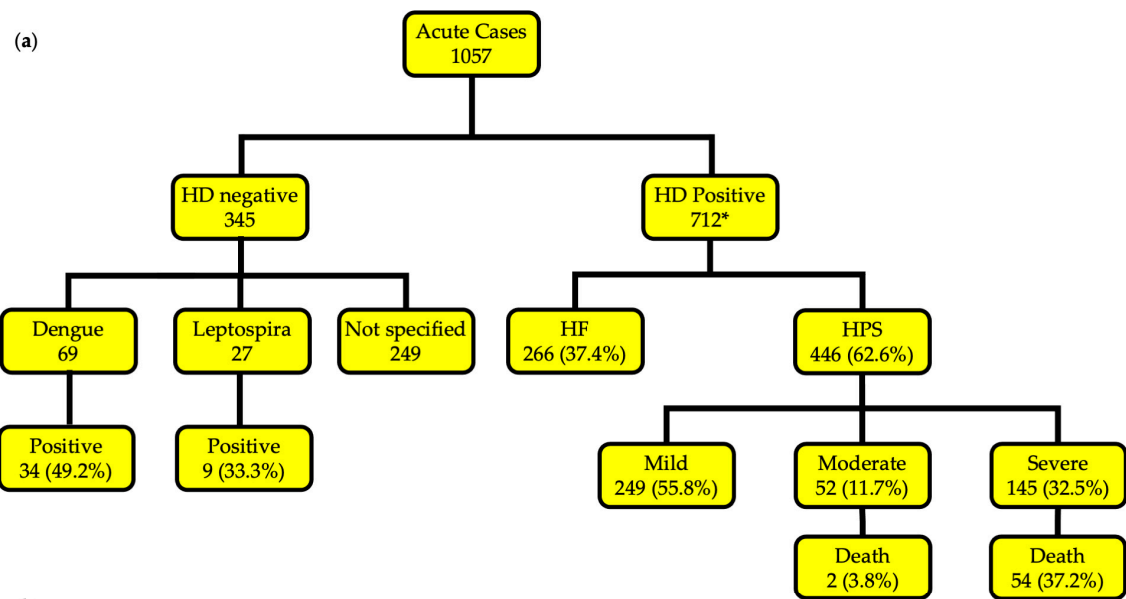

(b)

| Criteria         | Categories       |                            |                       |                            |
|------------------|------------------|----------------------------|-----------------------|----------------------------|
|                  | Hantavirus fever | Mild HCPS                  | Moderate HCPS         | Severe HCPS                |
| Febrile prodrome | +                | +                          | +                     | +                          |
| Dyspnea*         | Absent           | Absent or occasional       | Marked                | Marked                     |
| Chest X-ray      | Normal           | Abnormal                   | Abnormal              | Abnormal                   |
| Hypoxemia        | Absent           | SaO <sub>2</sub> >85%      | SaO <sub>2</sub> <85% | SaO <sub>2</sub> <85%      |
| Oxygen therapy   | No               | Nasal cannula or face mask | CPAP/MV               | MV + inotropic/vasopressor |

**Figure S1:** (a) Spectrum of hantavirus disease in Panama, 1999–2019. HD = Hantavirus disease. HF = Hantavirus fever. HPS = Hantavirus Pulmonary Syndrome. In 249 negative samples for hantavirus, no other cause was specified. IgM antibodies against DENV were detected in fifteen HD patients (HF: 4, HPS: 11). Case-fatality rate= 12.6% (56/446); One patient, whose onset of illness was 24 August 1999, was identified retrospective [13]; (b) Definitions of four HV disease categories [18].

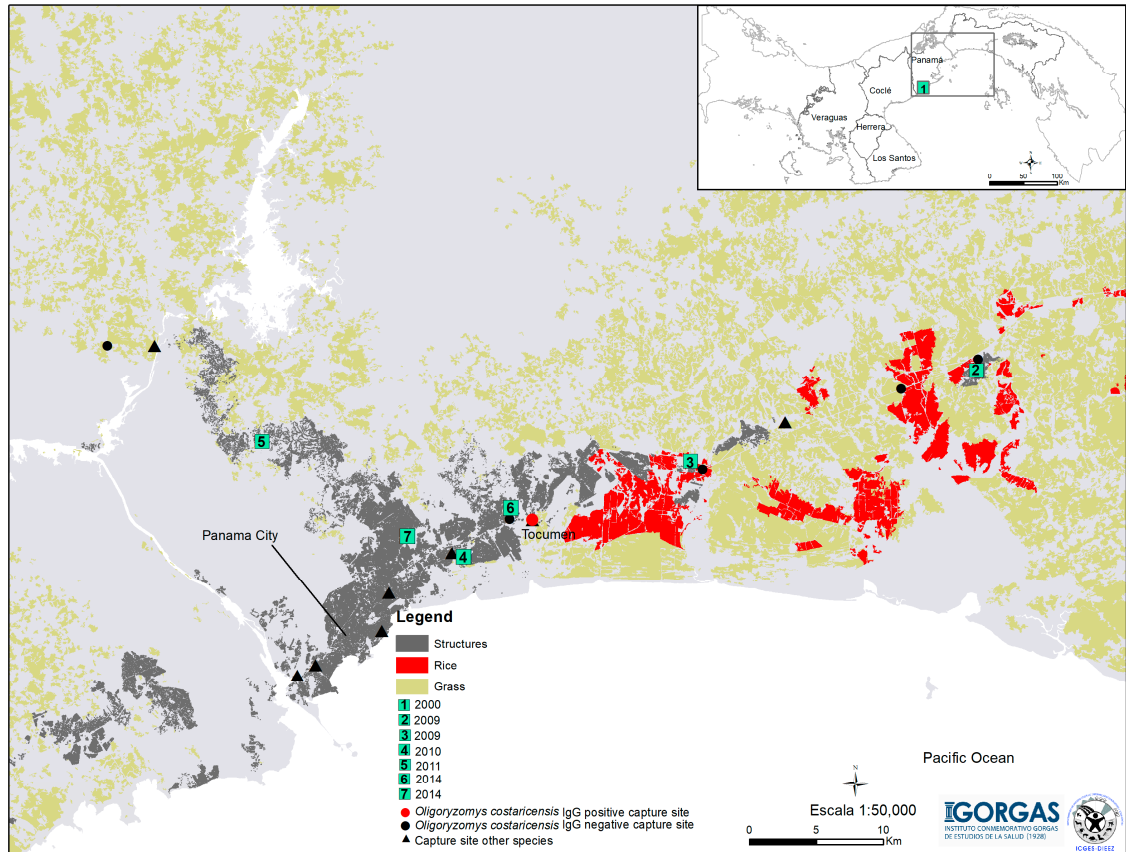

**Figure S2.** Seven cases of HPS reported in the Province of Panama, 1999–2019. The green squares with the numbers correspond to the cases of HPS diagnosed per year.

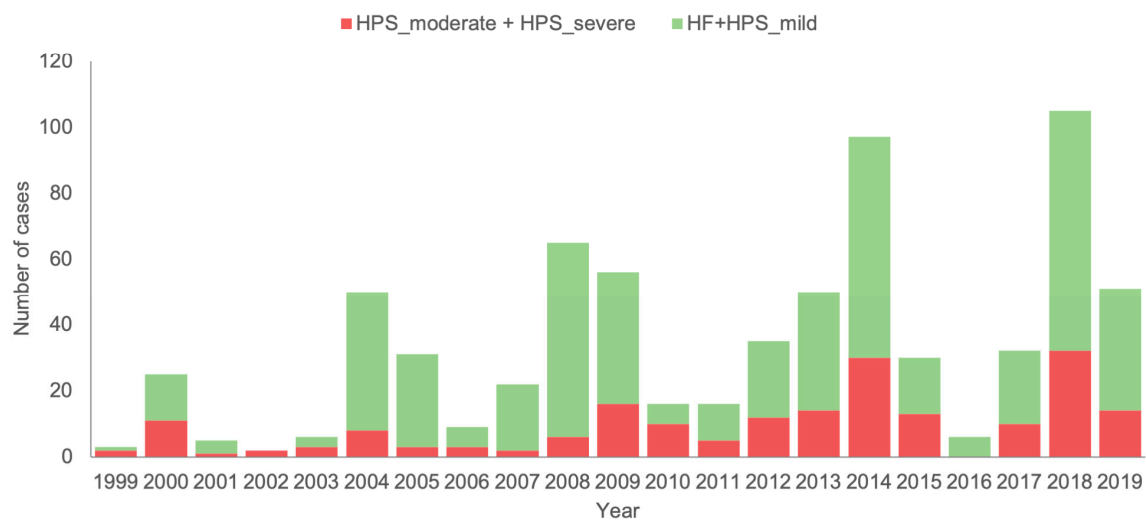

**Figure S3.** Number of mild (HF + HPS mild) and severe (HPS moderate + HPS severe) cases of hantavirus disease per year, 1999–2019.
